# Supplementary material for: Graphlet Based Metrics for the Comparison of Gene Regulatory Networks
Source: PubMed Central journal article supplement (PMC5047442; doi:10.1371/journal.pone.0163497), 2016-10-03
Supplement: pone.0163497.s001.pdf [file pone.0163497.s001.pdf]

# Graphlet Based Metrics for the Comparison of Gene Regulatory Networks:

Fig S1: Topological comparison of two small networks

Alberto J.M. Martin, Calixto Dominguez, Sebastián Contreras-Riquelme, David S. Holmes and Tomas Perez-Acle

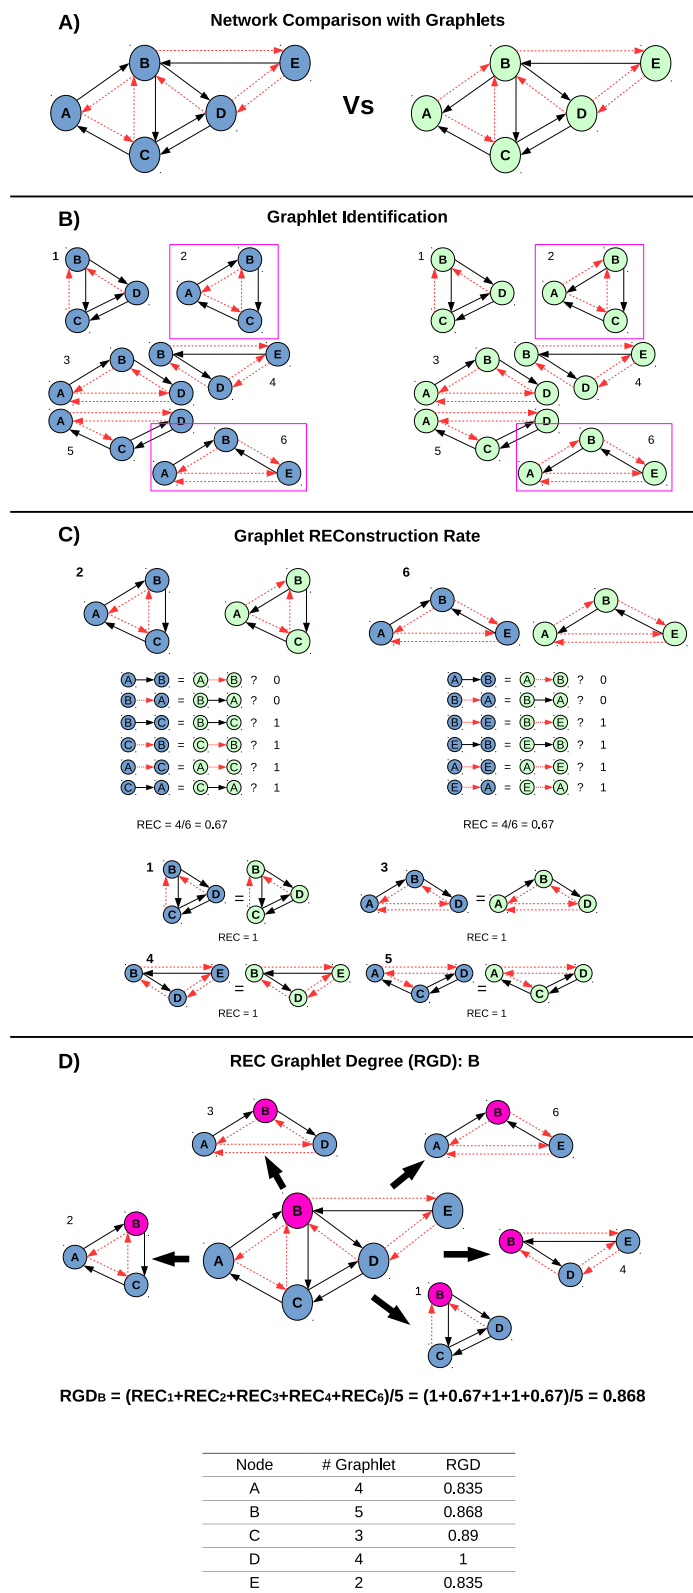

**Example on how REC and RGD are used to compare two simple networks.** A) shows the two small networks that are been compared; B) identification of each graphlet in each network; C) calculation of REC for each graphlet; D) computation of how RGD for node B. Black edges denote true interactions, and red-dashed edges depict false ones.
