# Supplementary material for: Graphlet Based Metrics for the Comparison of Gene Regulatory Networks
Source: PubMed Central journal article supplement (PMC5047442; doi:10.1371/journal.pone.0163497), 2016-10-03
Supplement: pone.0163497.s006.pdf [file pone.0163497.s006.pdf]

# Graphlet Based Metrics for the Comparison of Gene Regulatory Networks:

Table S1: Components of the condition specific and gold standard GRNs

Alberto J.M. Martin, Calixto Dominguez, Sebastián Contreras-Riquelme, David S. Holmes and Tomas Perez-Acle

|            | Gold Standard | Biofilm |      |      |      | Suspension |      |      |      |
|------------|---------------|---------|------|------|------|------------|------|------|------|
|            |               | 4h      | 7h   | 15h  | 24h  | 4h         | 7h   | 15h  | 24h  |
| TFs        | 202           | 157     | 156  | 127  | 168  | 161        | 137  | 115  | 125  |
| Nodes      | 1805          | 1631    | 1603 | 1493 | 1591 | 1620       | 1556 | 1513 | 1495 |
| True edges | 4511          | 4006    | 3960 | 3537 | 3914 | 4034       | 3714 | 3442 | 3527 |

This table shows the number of Transcription Factors (TFs), nodes (genes) and true edges occurring at four time points of the GRN of *E. coli* cultured in suspension and forming biofilms.
