# Supplementary material for: Graphlet Based Metrics for the Comparison of Gene Regulatory Networks
Source: PubMed Central journal article supplement (PMC5047442; doi:10.1371/journal.pone.0163497), 2016-10-03
Supplement: pone.0163497.s007.pdf [file pone.0163497.s007.pdf]

Graphlet Based Metrics for the Comparison of Gene Regulatory Networks:

Table S2: Graphlets in condition specific and gold standard GRNs

Alberto J.M. Martin, Calixto Dominguez, Sebastián Contreras-Riquelme, David S. Holmes and Tomas Perez-Acle

| Type | Gold   | Biofilm |        |        |        | Suspension |        |        |        |
|------|--------|---------|--------|--------|--------|------------|--------|--------|--------|
|      |        | 4h      | 7h     | 15h    | 24h    | 4h         | 7h     | 15h    | 24h    |
| 1    | 329819 | 307539  | 306911 | 299158 | 303724 | 308097     | 302940 | 298927 | 299144 |
| 2    | 6305   | 5162    | 4989   | 4032   | 4913   | 5235       | 4365   | 3508   | 4067   |
| 3    | 1634   | 1505    | 1504   | 1477   | 1573   | 1505       | 1328   | 1263   | 1506   |
| 4    | 4338   | 3667    | 3598   | 2932   | 3473   | 3768       | 3173   | 2687   | 2827   |
| 5    | 1641   | 1468    | 1414   | 1159   | 1437   | 1533       | 1236   | 1082   | 1198   |
| 6    | 488    | 468     | 470    | 459    | 479    | 468        | 458    | 456    | 460    |
| 7    | 89     | 73      | 64     | 53     | 79     | 73         | 57     | 52     | 62     |
| 8    | 5      | 3       | 1      | 1      | 5      | 3          | 1      | 1      | 3      |
| 9    | 0      | 0       | 0      | 0      | 0      | 0          | 0      | 0      | 0      |
| 10   | 8      | 6       | 5      | 4      | 7      | 6          | 3      | 4      | 5      |
| 11   | 31     | 20      | 23     | 18     | 28     | 20         | 17     | 16     | 19     |
| 12   | 3      | 3       | 3      | 3      | 3      | 3          | 3      | 3      | 3      |
| 13   | 1      | 1       | 1      | 1      | 1      | 1          | 1      | 1      | 1      |
| NOG  | 11     | 8       | 6      | 6      | 8      | 8          | 6      | 6      | 4      |

This table shows the occurrence of each graphlet type and the number of genes that do not form any graphlet (NOG) along four time points when *E. coli* was cultured in suspension, forming biofilms and in the entire gold standard. Graphlets of types 9 are absent in all these condition specific networks.
