# Supplementary material for: Graphlet Based Metrics for the Comparison of Gene Regulatory Networks
Source: PubMed Central journal article supplement (PMC5047442; doi:10.1371/journal.pone.0163497), 2016-10-03
Supplement: pone.0163497.s008.pdf [file pone.0163497.s008.pdf]

Graphlet Based Metrics for the Comparison of Gene Regulatory Networks:

Table S3: Comparison of RGD with other centrality metrics in condition specific networks at 15 hours

Alberto J.M. Martin, Calixto Dominguez, Sebastián Contreras-Riquelme, David S. Holmes and Tomas Perez-Acle

| Comp. | Cent   | $\rho$ | $\tau$ | r      | d     | dc    | Both | RGD | M    | #    |
|-------|--------|--------|--------|--------|-------|-------|------|-----|------|------|
| BS    | ASPL   | -0.265 | -0.247 | -0.174 | 0.248 | 0.898 | 41   | 358 | 3    | 1456 |
|       | BC     | -0.217 | -0.201 | -0.110 | 0.253 | 0.898 | 42   | 357 | 12   | 1456 |
|       | CC     | -0.265 | -0.247 | -0.176 | 0.248 | 0.898 | 41   | 358 | 3    | 1456 |
|       | CLC    | -0.496 | -0.455 | -0.232 | 0.190 | 0.636 | 158  | 241 | 35   | 1456 |
|       | E      | -0.216 | -0.202 | -0.172 | 0.259 | 0.945 | 22   | 377 | 0    | 1456 |
|       | EC     | -0.643 | -0.598 | -0.314 | 0.157 | 0.516 | 215  | 184 | 45   | 1456 |
|       | ID     | -0.629 | -0.587 | -0.449 | 0.161 | 0.527 | 210  | 189 | 45   | 1456 |
|       | OD     | -0.186 | -0.174 | -0.253 | 0.264 | 0.965 | 14   | 385 | 0    | 1456 |
|       | NC     | -0.604 | -0.508 | -0.065 | 0.231 | 0.520 | 310  | 89  | 247  | 1456 |
| SC    | -0.228 | -0.212 | -0.128 | 0.251  | 0.899 | 41    | 358  | 8   | 1456 |      |
| SB    | ASPL   | -0.219 | -0.201 | -0.207 | 0.325 | 0.927 | 37   | 466 | 7    | 1456 |
|       | BC     | -0.152 | -0.138 | -0.096 | 0.334 | 0.933 | 35   | 468 | 19   | 1456 |
|       | CC     | -0.219 | -0.200 | -0.314 | 0.325 | 0.927 | 37   | 466 | 7    | 1456 |
|       | CLC    | -0.430 | -0.385 | -0.246 | 0.266 | 0.716 | 154  | 349 | 39   | 1456 |
|       | E      | -0.192 | -0.176 | -0.170 | 0.333 | 0.960 | 20   | 483 | 2    | 1456 |
|       | EC     | -0.290 | -0.264 | -0.159 | 0.318 | 0.755 | 150  | 353 | 110  | 1456 |
|       | ID     | -0.276 | -0.252 | -0.214 | 0.320 | 0.761 | 146  | 357 | 109  | 1456 |
|       | OD     | -0.163 | -0.149 | -0.130 | 0.337 | 0.974 | 13   | 490 | 1    | 1456 |
|       | NC     | -0.631 | -0.563 | -0.122 | 0.159 | 0.359 | 414  | 89  | 143  | 1456 |
| SC    | -0.172 | -0.157 | -0.063 | 0.331  | 0.932 | 35    | 468  | 14  | 1456 |      |

Columns show, from left to right, Spearman's correlation ( $\rho$ ); Kendall's correlation ( $\tau$ ); Pearson correlation (r); The rate of disagreement (d = nodes identified only by one metric/# nodes); The rate of disagreement for nodes with variations in the metric (dc = nodes identified only by one metric/nodes identified only by one or the two metrics metric); The number of nodes identified by both metrics (Both); only by RGD (RGD); only by the other metric (M); and the total number of nodes (#). The comparisons were performed using only those nodes for which both RGD and the centrality measurements could be computed using the Biofilm networks as reference (BS) and the Suspension network as reference (SB). Centrality metrics are (Cent): Average Shortest Path Length (ASPL); Betweenness Centrality (BC); Closeness Centrality (CC); Clustering Coefficient (CLC); Eccentricity (E); Edge Count (EC); Indegree (ID); Outdegree (OD); Neighborhood Connectivity (NC); and Stress Centrality (SC). See below for a definition of the centralities used.

**Centrality Metrics:** Let  $G = (V, E)$  be a graph formed by a set of vertices or nodes (V) and a set of edges (E). Sub-indices  $i$  and  $j$  represent specific nodes ( $v_i$  and  $v_j$  respectively) and  $A_{i,j}$  values of the adjacency matrix that represent  $G$ . Each position in this matrix can be assigned two values,  $A_{i,j} = 1$  if the product of node  $v_i$  regulates the expression of node  $v_j$ , and  $A_{i,j} = -1$  if the product of node  $v_i$  does not regulates node  $v_j$ .

- In-degree (ID or  $k^-$ ):  $k^-(i) = \sum_{j \in V} A_{ji}$ ;
- Out-degree (OD or  $k^+$ ):  $k^+(i) = \sum_{j \in V} A_{ij}$ ;
- Edge count or degree (EC or  $k$ ):  $k(i) = \sum_{j \in V} (A_{ij} + A_{ji}) = k^-(i) + k^+(i)$ ;
- Clustering Coefficient (CLC):  $C(i) = \frac{e_i}{(k_i(k_i-1))}$ ;  
where  $e_i$  is the number of connected neighbors of node  $i$  and  $k_i$  its degree.
- Neighborhood connectivity (NC):  $NC(i) = \frac{\sum_{j \in N(i)} k_j}{k_i}$ ;  
where  $N(i)$  is the set of neighbors of node  $i$  and  $k_n$  is the degree of node  $n$ .
- Average Shortest Path Length (ASPL):  $ASPL(i) = avg(L(i, j)), \forall j \neq i$ ;  
where  $L(i, j)$  is the length of the shortest path from node  $i$  to node  $j$ .
- Betweenness Centrality (BC or  $Cb$ ):  $Cb(i) = \sum_{j \neq i} \sum_{k \neq i, j} (\sigma_{jk}(i) / \sigma_{jk})$ ;  
where  $\sigma_{jk}$  is the number of shortest paths from node  $j$  to node  $k$  and  $\sigma_{jk}(i)$  is the number of shortest paths from  $j$  to  $k$  in which node  $i$  lies on.
- Closeness Centrality (CC or  $Cc$ ):  $Cc(i) = \frac{1}{avg(L(i, j))} = \frac{1}{ASPL(i)}$ ;
- Eccentricity (E):  $E(i) = max(L(i, j)), \forall j \neq i$ ;
- Stress Centrality (SC or  $Cs$ ):  $Cs(i) = \sum_{j \neq i} \sum_{k \neq i, j} \sigma_{jk}(i)$ ;  
where  $\sigma_{jk}(i)$  is the number of shortest paths from  $j$  to  $k$  in which node  $i$  lies on.

Comparison of centrality metrics versus RGD on the comparisons performed using the Biofilm network at 15 hours as reference:

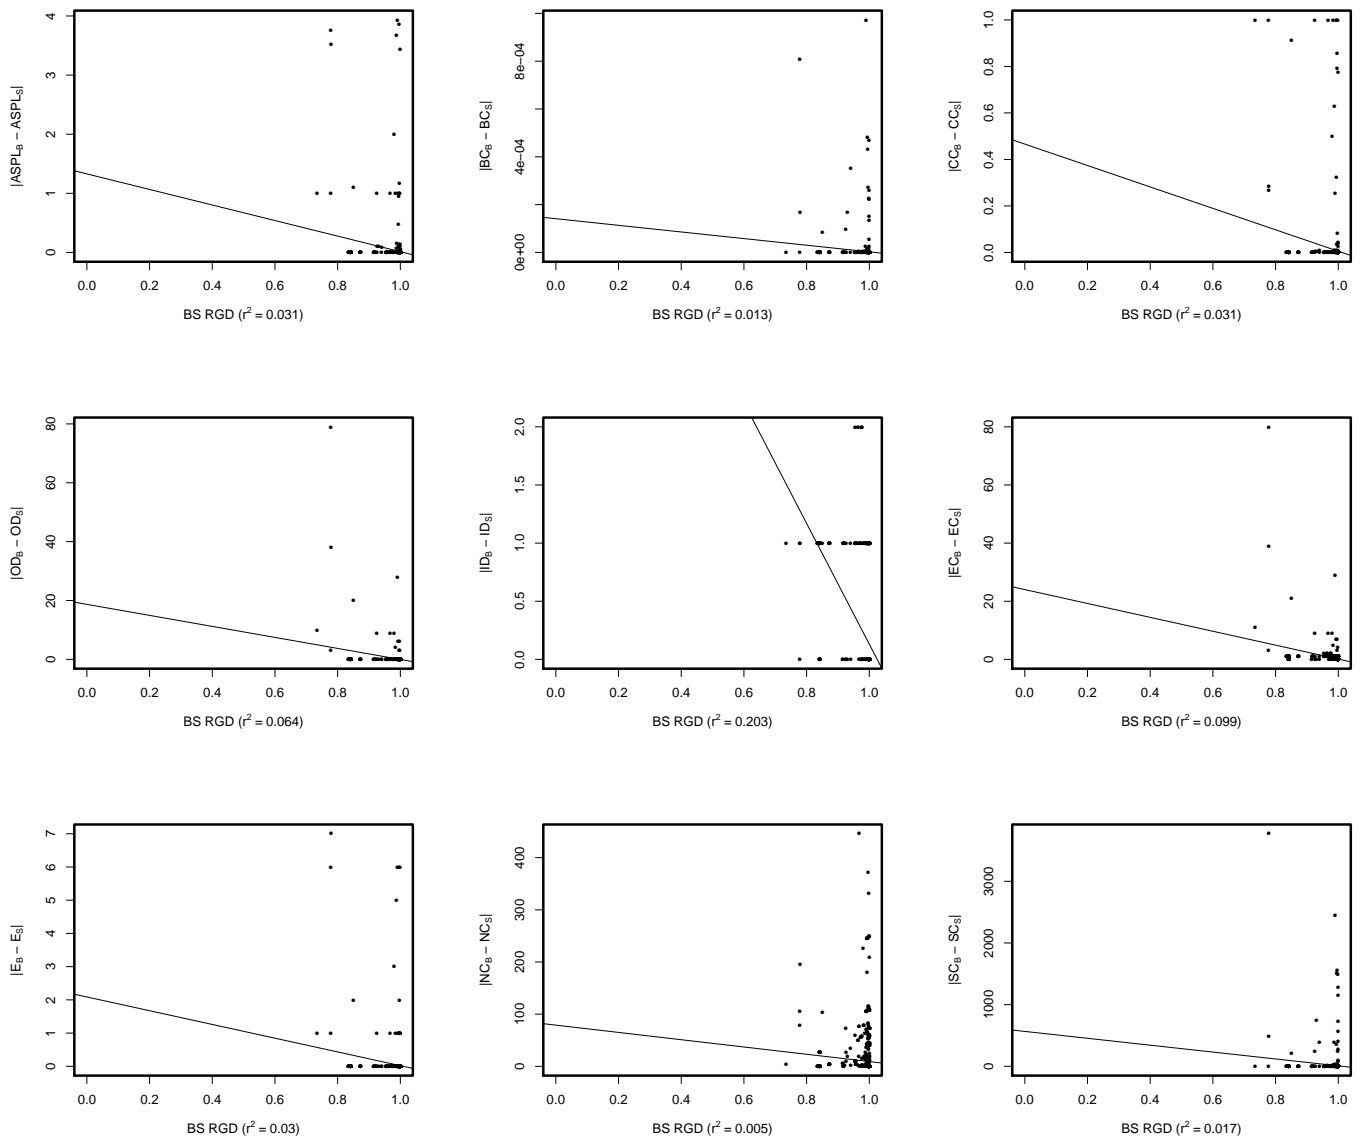

Plots showing the relationships between the differences in centrality metrics and RGD on the same data as in Table S3. Regression lines and regression coefficients (shown between brackets in the x-axis title) were calculated using R using RGD as dependent variable.

## Comparison of centrality metrics versus RGD on the comparisons performed using the Suspension network at 15 hours as reference:

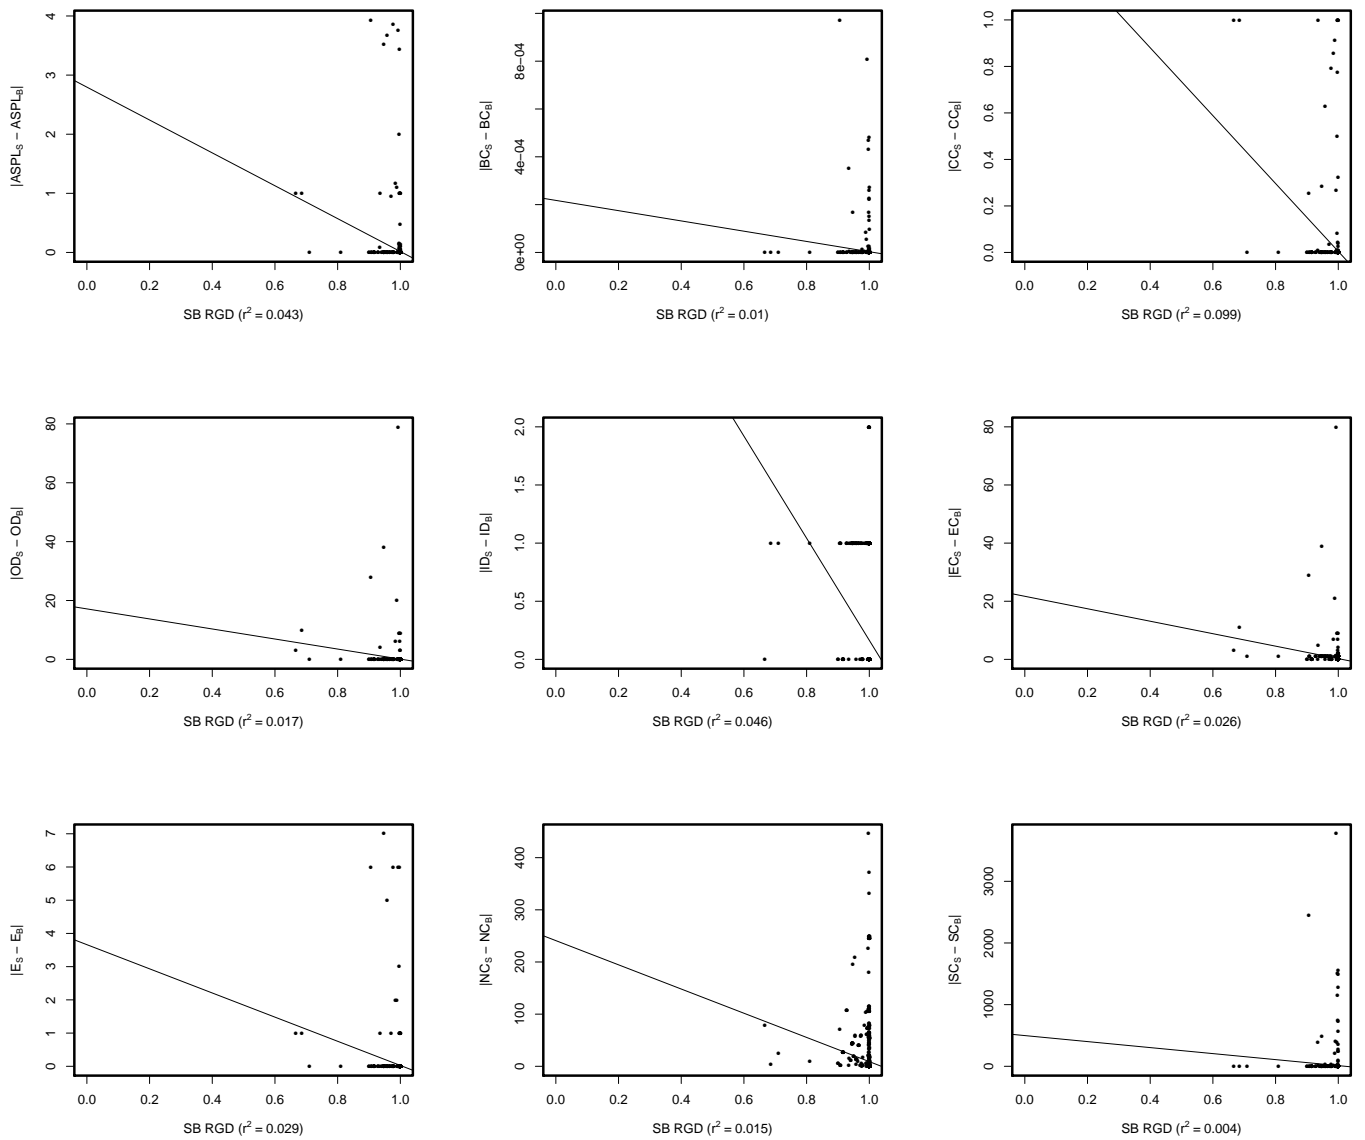

Plots showing the relationships between the differences in centrality metrics and RGD on the same data as in Table S3. Regression lines and regression coefficients (shown between brackets in the x-axis title) were calculated using R using RGD as dependent variable.
